# Supplementary material
Source: MDPI journal article supplement (https://www.mdpi.com/2227-7102/13/8/850)
Supplement: s1 [file s1 › education-2532805-supplementary.pdf]

**Table S1:** The detailed breakdown of face-to-face and online PBL process.

|              | Face-to Face PBL (process)                                                                                                                                                                  | Online PBL (process)                                                                                                                                                                                              | Face-to-Face PBL (tools)              | Online PBL (tools)                                             |
|--------------|---------------------------------------------------------------------------------------------------------------------------------------------------------------------------------------------|-------------------------------------------------------------------------------------------------------------------------------------------------------------------------------------------------------------------|---------------------------------------|----------------------------------------------------------------|
| <b>PBL 1</b> | Introduction to the problem<br>- Distribute page 1 of case study<br>- Select one student to read<br>- A student records the key information of the WB                                       | Introduction to the problem<br>- Project page 1 of case study online<br>- Select one student to read<br>- A student records the key information on a shared PowerPoint presentation                               | - Printed handout<br>- WB and markers | - Webex meetings (Share screen)<br>- OneDrive to share the PPT |
|              | Generating/Ranking Hypothesis<br>- Brainstorm and generate hypothesis (justify using given information)<br>- A student records the Hypothesis on the WB<br>- Rank your hypothesis on the WB | Generating Hypothesis<br>- Brainstorm and generate hypothesis (justify using given information)<br>- A student records the Hypothesis on the shared PowerPoint<br>- Rank your hypothesis on the shared PowerPoint | - WB and markers                      | - Shareable PPT                                                |
|              | Generating Questions<br>- Identify open-ended questions to help distinguish between hypotheses and record this on the WB                                                                    | Generating Questions<br>- Identify open-ended questions to help distinguish between hypotheses and record this on the shareable PPT                                                                               | - WB and markers                      | - Shareable PPT                                                |
|              | Continuation of the Case (page 2)<br>- Record Key information<br>- Brainstorm<br>- Re-rank hypothesis<br>- Start thinking about potential mechanisms                                        | Continuation of the Case (page 2)<br>- Record Key information<br>- Brainstorm<br>- Re-rank hypothesis<br>- Start thinking about potential mechanisms                                                              | - WB and markers                      | - Shareable PPT                                                |
|              | Continuation of the Case (page 3 ... n)<br>- Repeat as above                                                                                                                                | Continuation of the Case (page 3 ... n)<br>- Repeat as above                                                                                                                                                      |                                       |                                                                |

|                          |                                                                                                                                                                                |                                                                                                                                                                                           |                                                    |                         |
|--------------------------|--------------------------------------------------------------------------------------------------------------------------------------------------------------------------------|-------------------------------------------------------------------------------------------------------------------------------------------------------------------------------------------|----------------------------------------------------|-------------------------|
|                          | Identifying gaps ins knowledge and recording of Learning Outcomes<br>- Through-out the PBL<br>- Record on the WB<br>- At the end of the session review and agree on final LOBs | Identifying gaps ins knowledge and recording of Learning Outcomes<br>- Through-out the PBL<br>- Record on the shareable PPT<br>- At the end of the session review and agree on final LOBs | - WB and markers<br>- Take a photo the WB          | - Shareable PPT         |
| <b>Independent Study</b> | Study all LOBs and take notes.                                                                                                                                                 | Study all LOBs and record findings on Moodle                                                                                                                                              | - Personal notes on paper /computer/any other mode | - Upload LOBs on Moodle |
| <b>PBL 2</b>             | Summarize the case using student notes                                                                                                                                         | Summarize the case using shareable PPT                                                                                                                                                    | - Student notes or photo of the WB                 | - Shareable PPT         |
|                          | Report-back on LOBs from PBL 1<br>- Capture notes on the WB                                                                                                                    | Report-back on LOBs from PBL 1<br>- Capture notes on the shareable PPT                                                                                                                    | - WB and markers                                   | - Shareable PPT         |
|                          | Receive new patient information and repeat the process as for PBL1                                                                                                             | Receive new patient information and repeat the process as for PBL1                                                                                                                        |                                                    |                         |
| <b>Independent Study</b> | Study all LOBs and take notes.                                                                                                                                                 | Study all LOBs and record findings on Moodle                                                                                                                                              | - Personal notes on paper /computer/any other mode | - Upload LOBs on Moodle |
| <b>PBL3</b>              | Summarize the case using student notes                                                                                                                                         | Summarize the case using shareable PPT                                                                                                                                                    | - Student notes or photo of the WB                 | - Shareable PPT         |
|                          | Report-back on LOBs from PBL 1<br>- Capture notes on the WB                                                                                                                    | Report-back on LOBs from PBL 1<br>- Capture notes on the shareable PPT                                                                                                                    | - WB and markers                                   | - Shareable PPT         |
|                          | Conclusion of the case                                                                                                                                                         | Conclusion of the case                                                                                                                                                                    |                                                    |                         |

WB: Whiteboard; PPT: PowerPoint.
